# Supplementary material for: Disparities in Continuous Glucose Monitoring Among Patients Receiving Care in Federally Qualified Health Centers
Source: PubMed Central journal article supplement (PMC11584923; doi:10.1001/jamanetworkopen.2024.45316), 2024-11-22

## Supplemental Online Content

Wallia A, Agarwal S, Owen AL, et al. Disparities in continuous glucose monitoring among patients in federally qualified health centers. *JAMA Netw Open*. 2024;7(11):e2445316. doi:10.1001/jamanetworkopen.2024.45316

**eTable 1.** Multivariable Association of Patient Characteristics and Continuous Glucose Monitor Prescription (Primary Model)

**eTable 2.** Descriptive Statistics of Additional Variables in Supplementary Logistic Regression Analysis

**eTable 3.** Multivariable Association of Patient Characteristics and Continuous Glucose Monitor Prescription with Additional Variables

**eFigure 1.** CGM Prescriptions by Month and Ethnicity

**eFigure 2.** CGM Prescriptions by Month and Insurance Status

**eFigure 3.** CGM Prescriptions by Month and Race

This supplemental material has been provided by the authors to give readers additional information about their work.

**eTable 1. Multivariable Association of Patient Characteristics and Continuous Glucose Monitor Prescription (Primary Model)**

| Variable                                           | Patients with Type 1 Diabetes (n=1,168) | Patients with Type 2 Diabetes (n=35,216) |
|----------------------------------------------------|-----------------------------------------|------------------------------------------|
|                                                    | OR (95% CI)                             | OR (95% CI)                              |
| Sex                                                |                                         |                                          |
| Male                                               | REF                                     | REF                                      |
| Female                                             | 0.97 (0.66 – 1.42)                      | 1.00 (0.81 – 1.24)                       |
| Race                                               |                                         |                                          |
| White                                              | REF                                     | REF                                      |
| Black                                              | 0.61 (0.38 – 0.99)                      | 0.76 (0.59 – 0.98)                       |
| Other                                              | 0.57 (0.19 – 1.68)                      | 0.48 (0.30 – 0.77)                       |
| Ethnicity                                          |                                         |                                          |
| Non-Hispanic                                       | REF                                     | REF                                      |
| Hispanic                                           | 0.30 (0.16 – 0.57)                      | 0.43 (0.32 – 0.57)                       |
| Age, years (continuous)                            | 0.98 (0.97 – 1.00)                      | 1.00 (0.99 – 1.01)                       |
| A1c, %                                             |                                         |                                          |
| ≤ 7.0                                              | REF                                     | REF                                      |
| 7.1 – 8.9                                          | 1.39 (0.74 – 2.60)                      | 2.25 (1.68 – 3.00)                       |
| ≥ 9.0                                              | 1.79 (1.00 – 3.21)                      | 3.17 (2.38 – 4.22)                       |
| Diabetes Complications Severity Index (continuous) | 1.04 (0.91 – 1.19)                      | 1.15 (1.08 – 1.22)                       |
| Insurance                                          |                                         |                                          |
| Private                                            | REF                                     | REF                                      |
| Medicaid                                           | 0.69 (0.42 – 1.14)                      | 0.97 (0.74 – 1.28)                       |
| Medicare                                           | 0.71 (0.30 – 1.65)                      | 0.75 (0.52 – 1.08)                       |
| Uninsured                                          | 0.42 (0.23 – 0.74)                      | 0.42 (0.31 – 0.58)                       |
| Year of Last Visit                                 |                                         |                                          |
| 2015                                               | (empty)                                 | REF                                      |
| 2016                                               | REF                                     | 0.85 (0.05 – 13.61)                      |
| 2017                                               | (empty)                                 | 1.50 (0.14 – 16.57)                      |
| 2018                                               | 1.20 (0.11 – 13.58)                     | 3.24 (0.38 – 27.80)                      |
| 2019                                               | 3.04 (0.37 – 24.96)                     | 16.44 (2.24 – 120.57)                    |
| 2020                                               | 9.93 (1.34 – 73.42)                     | 26.81 (3.74 – 191.99)                    |
| 2021                                               | 16.22 (2.19 – 120.09)                   | 41.63 (5.82 – 297.61)                    |

OR = Odds Ratio

**eTable 2. Descriptive Statistics of Additional Variables in Supplementary Logistic Regression Analysis**

| Variable                                    | Patients with Type 1 Diabetes (n=1,168) | Patients with Type 2 Diabetes (n=35,216) |
|---------------------------------------------|-----------------------------------------|------------------------------------------|
|                                             | n (%)                                   | n (%)                                    |
| First Observed A1c Value in Study Period, % |                                         |                                          |
| ≤7.0                                        | 167 (14.3)                              | 14,190 (40.3)                            |
| 7.1 – 8.9                                   | 342 (29.3)                              | 9,568 (27.2)                             |
| ≥ 9.0                                       | 659 (56.4)                              | 11,458 (32.5)                            |
|                                             |                                         |                                          |
| Number of Office Visits during Study Period |                                         |                                          |
| 1-4                                         | 278 (24.0)                              | 6,919 (19.7)                             |
| 5-8                                         | 264 (23.0)                              | 7,014 (19.9)                             |
| 9-14                                        | 247 (21.2)                              | 7,198 (20.4)                             |
| 15-24                                       | 209 (17.9)                              | 7,382 (21.0)                             |
| 25+                                         | 170 (14.6)                              | 6,703 (19.0)                             |
|                                             |                                         |                                          |
| Insulin Prescription during Study Period    |                                         |                                          |
| Yes                                         | 1,092 (93.5)                            | 11,672 (33.1)                            |
| No                                          | 76 (6.5)                                | 23,544 (66.9)                            |

**eTable 3. Multivariable Association of Patient Characteristics and Continuous Glucose Monitor Prescription with Additional Variables**

| Variable                                           | Patients with Type 1 Diabetes (n=1,168) | Patients with Type 2 Diabetes (n=35,216) |
|----------------------------------------------------|-----------------------------------------|------------------------------------------|
|                                                    | OR (95% CI)                             | OR (95% CI)                              |
| Sex                                                |                                         |                                          |
| Male                                               | REF                                     | REF                                      |
| Female                                             | 1.01 (0.68 – 1.49)                      | 0.90 (0.73 – 1.12)                       |
| Race                                               |                                         |                                          |
| White                                              | REF                                     | REF                                      |
| Black                                              | 0.63 (0.39 – 1.03)                      | 0.75 (0.58 – 0.97)                       |
| Other                                              | 0.55 (0.19 – 1.65)                      | 0.55 (0.34 – 0.88)                       |
| Ethnicity                                          |                                         |                                          |
| Non-Hispanic                                       | REF                                     | REF                                      |
| Hispanic                                           | 0.31 (0.16 – 0.58)                      | 0.46 (0.34 – 0.62)                       |
| Age, years (continuous)                            | 0.98 (0.96 – 0.99)                      | 1.00 (0.99 – 1.01)                       |
| First A1c value, %                                 |                                         |                                          |
| ≤ 7.0                                              | REF                                     | REF                                      |
| 7.1 – 8.9                                          | 1.50 (0.78 – 2.89)                      | 1.35 (1.01 – 1.79)                       |
| ≥ 9.0                                              | 1.46 (0.80 – 2.66)                      | 1.28 (0.97 – 1.69)                       |
| Diabetes Complications Severity Index (continuous) | 1.02 (0.89 – 1.17)                      | 1.03 (0.97 – 1.10)                       |
| Insulin Prescription                               | 9.00 (1.20 – 67.79)                     | 4.76 (3.68 – 6.15)                       |
| Insurance                                          |                                         |                                          |
| Private                                            | REF                                     | REF                                      |
| Medicaid                                           | 0.73 (0.44-1.20)                        | 0.84 (0.64 – 1.12)                       |
| Medicare                                           | 0.72 (0.30 – 1.69)                      | 0.68 (0.47 – 0.98)                       |
| Uninsured                                          | 0.44 (0.24 – 0.78)                      | 0.42 (0.31 – 0.58)                       |
| Year of Last Visit                                 |                                         |                                          |
| 2015                                               | (empty)                                 | REF                                      |
| 2016                                               | REF                                     | 0.81 (0.05 – 12.90)                      |
| 2017                                               | (empty)                                 | 1.39 (0.13 – 15.36)                      |
| 2018                                               | 1.06 (0.09 – 12.06)                     | 2.94 (0.34 – 25.26)                      |
| 2019                                               | 2.62 (0.32 – 21.67)                     | 13.82 (1.88 – 101.72)                    |
| 2020                                               | 7.41 (0.99 – 55.38)                     | 21.82 (3.03 – 157.03)                    |
| 2021                                               | 11.80 (1.57 – 88.82)                    | 31.24 (4.34 – 224.87)                    |
| Number of Visits                                   |                                         |                                          |
| 1-4 Visits                                         | REF                                     | REF                                      |
| 5-8 Visits                                         | 1.34 (0.67 – 2.70)                      | 1.24 (0.79 – 1.95)                       |
| 9-14 Visits                                        | 1.65 (0.84 – 3.25)                      | 1.19 (0.77 – 1.85)                       |
| 15-24 Visits                                       | 2.41 (1.22 – 4.73)                      | 1.34 (0.88 – 2.04)                       |
| 25+                                                | 1.47 (0.69 – 3.14)                      | 1.87 (1.25 – 2.81)                       |

\* Additional variables are number of visits, first A1c value, and insulin prescription

**eFigure 1.** CGM Prescriptions by Month and Ethnicity

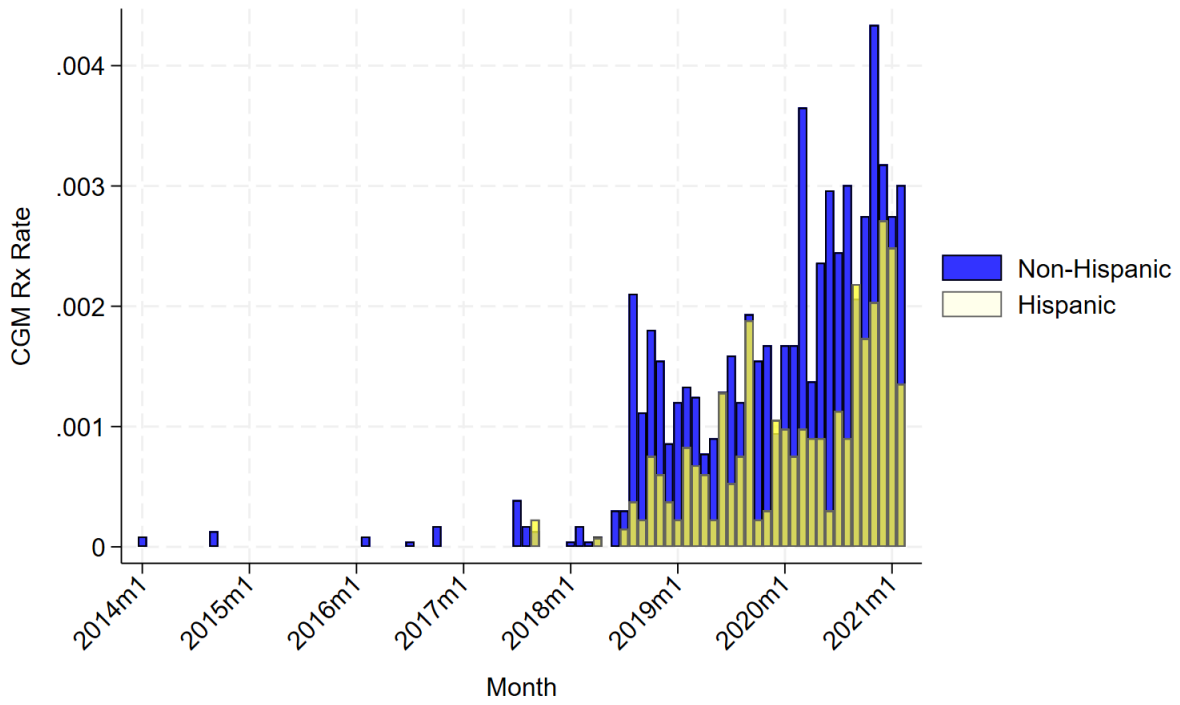

**eFigure 2.** CGM Prescriptions by Month and Insurance Status

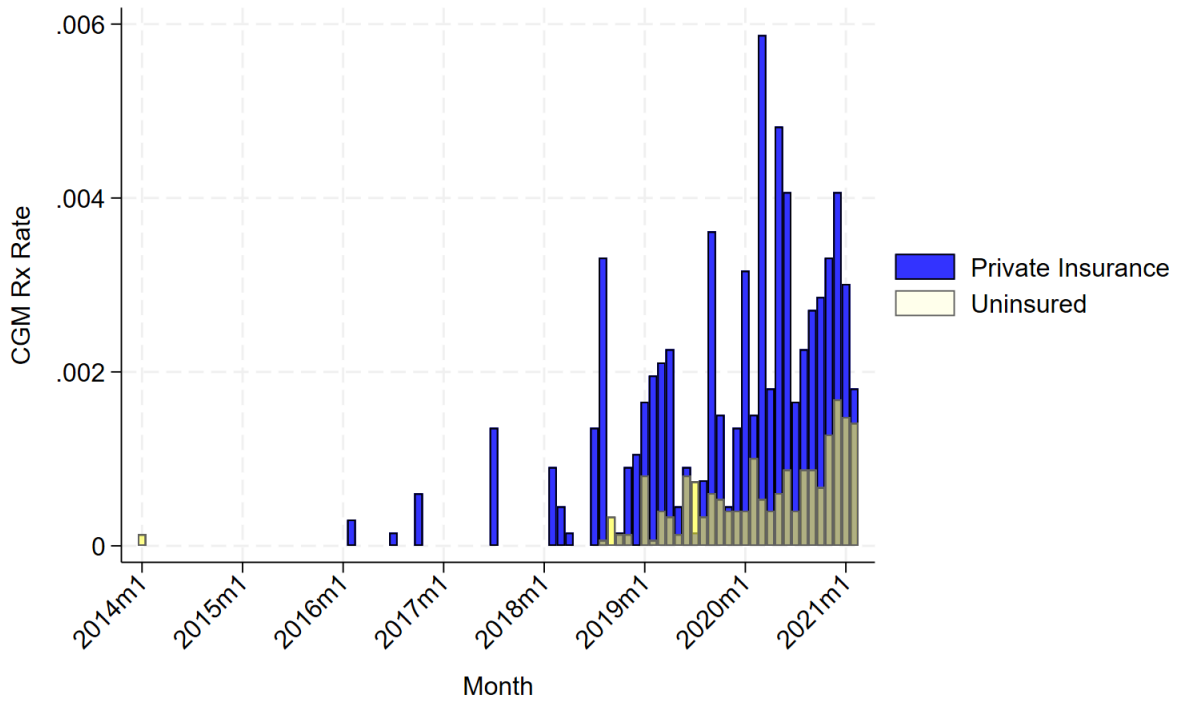

**eFigure 3.** CGM Prescriptions by Month and Race

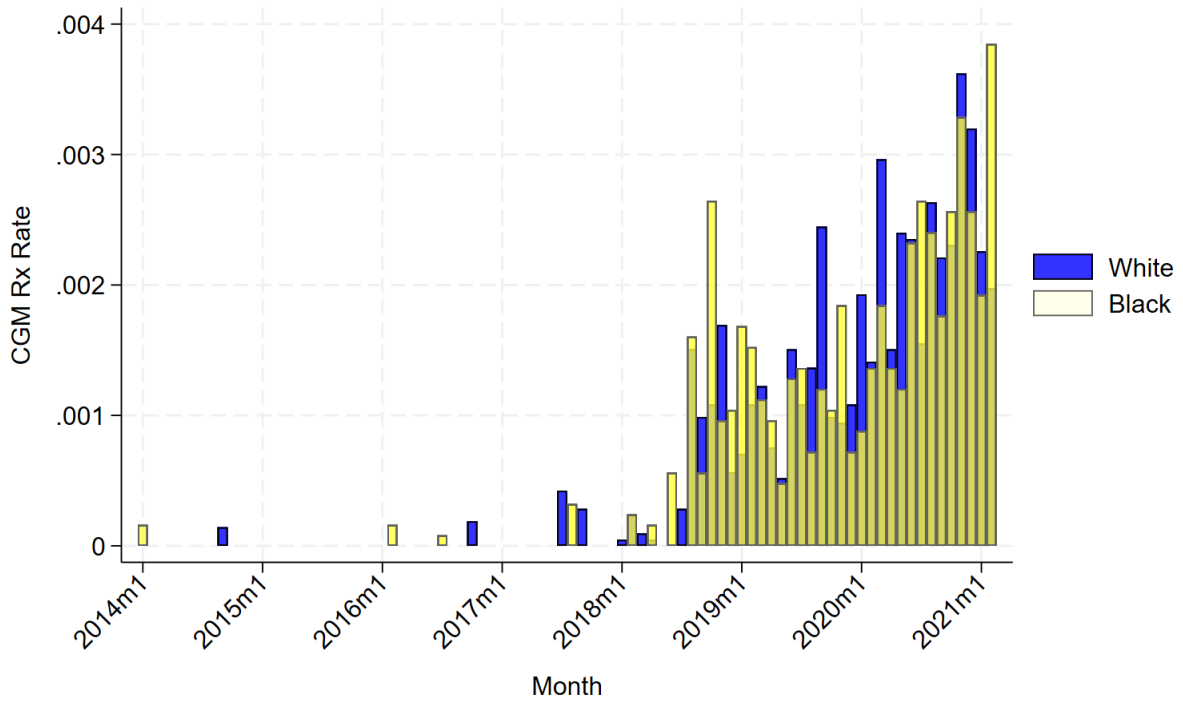

Supplement: jamanetwopen-e2445316-s001.pdf [file jamanetwopen-e2445316-s001.pdf]
