# Supplementary material for: Disparities in Continuous Glucose Monitoring Among Patients Receiving Care in Federally Qualified Health Centers
Source: PubMed Central journal article supplement (PMC11584923; doi:10.1001/jamanetworkopen.2024.45316), 2024-11-22
Supplement: jamanetwopen-e2445316-s002.pdf [file jamanetwopen-e2445316-s002.pdf]

## Data Sharing Statement

Wallia. Disparities in Continuous Glucose Monitoring Among Patients in Federally Qualified Health Centers. *JAMA Netw Open*. Published November 15, 2024.

doi:10.1001/jamanetworkopen.2024.45316

### Data

**Data available:** Yes

**Data types:** Other (please specify)

**Additional Information:** Per institutional policy

**How to access data:** upon request from a [wallia@northwestern.edu](mailto:wallia@northwestern.edu), per institutional policy

**When available:** With publication

### Supporting Documents

**Document types:** None

### Additional Information

**Who can access the data:** upon request, per institutional policy

**Types of analyses:** per institutional policy

**Mechanisms of data availability:** per institutional policy
